1 **Title:**

2 An immunodominance hierarchy exists in CD8<sup>+</sup> T cell responses to  
3 HLA-A\*02:01-restricted epitopes identified from the non-structural polyprotein 1a of  
4 SARS-CoV-2.

5 **Running title:**

6 Dominant hierarchy of CTL epitopes in SARS-CoV-2 pp1a

7

8 **Authors:**

9 Akira Takagi,<sup>1</sup> and Masanori Matsui<sup>2\*</sup>

10 **Affiliation:**

11 <sup>1</sup>School of Medical Technology, Faculty of Health and Medical Care, Saitama Medical  
12 University, 1397-1 Yamane, Hidaka-city, Saitama 350-1241, Japan

13 <sup>2</sup>Department of Microbiology, Faculty of Medicine, Saitama Medical University,  
14 38 Morohongo, Moroyama-cho, Iruma-gun, Saitama 350-0495, Japan

15 \*Corresponding author. E-mail address: [mmatsui@saitama-med.ac.jp](mailto:mmatsui@saitama-med.ac.jp)

16 Tel: +81-49-276-1438; Fax: +81-49-295-9107.

17

18 **Key words:**

19 SARS-CoV-2, COVID-19, CTL epitope, HLA-A\*02:01, pp1a, vaccine,

20 immunodominance, hierarchy

21

22 **Abstract**

23 COVID-19 vaccines are being rapidly developed and human trials are underway.  
24 Almost all of these vaccines have been designed to induce antibodies targeting spike  
25 protein of SARS-CoV-2 in expectation of neutralizing activities. However,  
26 non-neutralizing antibodies are at risk of causing antibody-dependent enhancement.  
27 Further, the longevity of SARS-CoV-2-specific antibodies is very short. Therefore, in  
28 addition to antibody-induced vaccines, novel vaccines on the basis of  
29 SARS-CoV-2-specific cytotoxic T lymphocytes (CTLs) should be considered in the  
30 vaccine development. Here, we attempted to identify HLA-A\*02:01-restricted CTL  
31 epitopes derived from the non-structural polyprotein 1a of SARS-CoV-2. Eighty-two  
32 peptides were firstly predicted as epitope candidates on bioinformatics. Fifty-four in 82  
33 peptides showed high or medium binding affinities to HLA-A\*02:01. HLA-A\*02:01  
34 transgenic mice were then immunized with each of the 54 peptides encapsulated into  
35 liposomes. The intracellular cytokine staining assay revealed that 18 out of 54 peptides  
36 were CTL epitopes because of the induction of IFN- $\gamma$ -producing CD8<sup>+</sup> T cells. In the 18  
37 peptides, 10 peptides were chosen for the following analyses because of their high  
38 responses. To identify dominant CTL epitopes, mice were immunized with liposomes  
39 containing the mixture of the 10 peptides. Some peptides were shown to be statistically  
40 predominant over the other peptides. Surprisingly, all mice immunized with the liposomal  
41 10 peptide mixture did not show the same reaction pattern to the 10 peptides. There were  
42 three pattern types that varied sequentially, suggesting the existence of an

43 immunodominance hierarchy, which may provide us more variations in the epitope  
44 selection for designing CTL-based COVID-19 vaccines.

45

46 **Importance**

47 For the development of vaccines based on SARS-CoV-2-specific cytotoxic T  
48 lymphocytes (CTLs), we attempted to identify HLA-A\*02:01-restricted CTL epitopes  
49 derived from the non-structural polyprotein 1a of SARS-CoV-2. Out of 82 peptides  
50 predicted on bioinformatics, 54 peptides showed good binding affinities to  
51 HLA-A\*02:01. Using HLA-A\*02:01 transgenic mice, 18 in 54 peptides were found to be  
52 CTL epitopes in the intracellular cytokine staining assay. Out of 18 peptides, 10 peptides  
53 were chosen for the following analyses because of their high responses. To identify  
54 dominant epitopes, mice were immunized with liposomes containing the mixture of the  
55 10 peptides. Some peptides were shown to be statistically predominant. Surprisingly, all  
56 immunized mice did not show the same reaction pattern to the 10 peptides. There were  
57 three pattern types that varied sequentially, suggesting the existence of an  
58 immunodominance hierarchy, which may provide us more variations in the epitope  
59 selection for designing CTL-based COVID-19 vaccines.

60

61

62

## 63 **Introduction**

64 In December 2019, the coronavirus disease 2019 (COVID-19) caused by the severe  
65 acute respiratory syndrome coronavirus 2 (SARS-CoV-2) was firstly identified in Wuhan,  
66 Hubei province, China. Since then, its subsequent spread of global infection has still  
67 continued to gain momentum. As of September 16th, 2020, the COVID-19 pandemic has  
68 infected more than 29.4 million people around the world and caused more than 931,000  
69 deaths. Although the clinical symptom is varied from asymptomatic or mild self-limited  
70 infection to severe life-threatening respiratory disease, the mechanism of disease outcome  
71 remains unclear. Many nations are struggling to find appropriate preventive and control  
72 strategies. However, there are no vaccines or antiviral drugs available for the treatment of  
73 this infectious disease.

74 There are seven coronaviruses that infect humans. In addition to SARS-CoV-2,  
75 SARS-CoV and middle-east respiratory syndrome coronavirus (MERS-CoV) cause  
76 severe pneumonia, whereas the other four human coronaviruses including HCoV-229E,  
77 -NL63, -OC43 and -HKU1 cause common cold (1). Like other coronaviruses,  
78 SARS-CoV-2 possesses a large single-stranded positive sense RNA genome (2). As  
79 shown in Fig. 1, the 5'-terminal two-thirds of the genome are composed of ORF1a and  
80 ORF1b. ORF1a encodes the polyprotein 1a (pp1a) containing non-structural proteins  
81 (nsp1-11) (Fig. 1). The remaining one-third of the genome encodes the structural proteins  
82 involving spike (S), envelope (E), membrane (M), and nucleocapsid (N) as well as  
83 accessory proteins (Fig. 1). Coronaviruses depend on S protein for binding to host cells.

84 The host cell receptor for SARS-CoV-2 is the angiotensin-converting enzyme 2 (ACE2)  
85 which is also the receptor for SARS-CoV (3, 4).

86 It was shown that the increased cell numbers of antibody-secreting cells, follicular  
87 helper T cells, activated CD4<sup>+</sup> T cells and CD8<sup>+</sup> T cells were observed in a non-severe  
88 COVID-19 patient (5), indicating that robust immune responses can be elicited to the  
89 newly emerged, SARS-CoV-2. Therefore, the induction of protective immunity against  
90 SARS-CoV-2 is considered to help control COVID-19. Vaccines are being rapidly  
91 developed in the world, and human trials are underway for several vaccine candidates,  
92 ranging from traditional vaccines comprised of inactivated SARS-CoV-2 preparations (6)  
93 to innovative vaccines such as subunit (7), RNA (8), DNA (9), and adenoviral (10)  
94 vaccines. Almost all of these vaccines have been designed to induce antibodies targeting  
95 S protein because some antibodies specific for the receptor binding domain (RBD) of S  
96 protein may have neutralizing activities and can interfere with the binding between ACE2  
97 on host cells and virus. In fact, it was reported that DNA vaccine encoding S protein  
98 induced neutralizing antibody in rhesus macaques and protected them from the challenge  
99 with SARS-CoV-2 (9). However, there are two major issues concerning this vaccine. One  
100 issue is that non-neutralizing and sub-neutralizing antibodies to S protein induced by this  
101 vaccine are at risk of causing antibody-dependent enhancement (ADE) (11). ADE is the  
102 phenomenon in which binding of suboptimal antibodies to viruses enhances viral entry  
103 mediated by Fc receptors into immune cells, and promotes inflammatory and tissue injury  
104 (12). ADE has been reported in the evaluation of vaccine candidates directed to S protein

105 for SARS-CoV (13-16). Because of their similarities, these findings enable us to foresee  
106 the high risks of ADE in SARS-CoV-2 vaccines directed to S protein. It is worth noting  
107 that RBD-specific antibodies with potent neutralizing activity are extremely rare among  
108 S-specific antibodies in COVID-19-convalescent individuals (17, 18), suggesting that the  
109 development of effective vaccines might require novel strategies to selectively target  
110 RBD of SARS-CoV-2. On the other hand, Passive immunization of RBD-specific  
111 monoclonal antibodies obtained from convalescent individuals might be safe and  
112 effective for the elimination of SARS-CoV-2 (19-21), but much more expensive to  
113 produce for worldwide use than vaccines (22). The other issue is the short longevity of  
114 neutralizing antibodies to SARS-CoV-2. It was previously reported that the  
115 SARS-CoV-specific antibodies are short-lived for at most about 2-3 years (23, 24) in  
116 comparison with SARS-CoV-specific memory T cells (25). The longevity of  
117 SARS-CoV-2-specific antibodies are likely to be even shorter, as indicated by antibody  
118 titers being undetectable or approaching baseline in the majority of  
119 SARS-CoV-2-infected individuals after 2-3 months post onset of symptoms (26). Taken  
120 together, these data strongly suggest that it does not seem right to rely too much on just  
121 the S-specific antibody-induced vaccine to control the COVID-19 pandemic.

122 In the viral infection, CD8<sup>+</sup> cytotoxic T lymphocytes (CTLs) play an important role for  
123 the clearance of virus as well as neutralizing antibodies. CTLs recognize virus-derived  
124 peptides in association with major histocompatibility complex class I (MHC-I) molecules  
125 on the surface of antigen presenting cells and kill virus-infected target cells. It was

126 reported that CD4<sup>+</sup> T cells and CD8<sup>+</sup> T cells are decreased in proportion to the disease  
127 severity and are exhausted in severe COVID-19 patients (27, 28), suggesting the  
128 significance of CD8<sup>+</sup> CTLs in the clearance of SARS-CoV-2. Furthermore,  
129 SARS-CoV-specific memory T cells persisted up to 11 years (25), predicting the long life  
130 of SARS-CoV-2-specific memory T cells. Therefore, in addition to antibody-induced  
131 vaccines, novel vaccines based on SARS-CoV-2-specific CTLs should also be considered  
132 in the future vaccine development for the prevention and disease control of COVID-19.

133 For the development of CTL-based COVID-19 vaccine, we here attempted to identify  
134 HLA-A\*02:01-restricted, dominant CTL epitopes derived from pp1a of SARS-CoV-2.  
135 Pp1a is a largest protein composed of 4,401 amino acids among SARS-CoV-2 proteins,  
136 and therefore, it seems highly possible to find dominant epitopes in this protein.  
137 Furthermore, pp1a is produced first in SARS-CoV-2-infected cells, suggesting  
138 pp1a-specific CTLs could kill infected cells before the formation of mature virions. In  
139 addition, this protein is composed of 11 non-structural regulatory proteins that are highly  
140 conserved among many different coronaviruses (29). To identify CTL epitopes, we used  
141 computational algorithms, HLA-A\*02:01 transgenic mice and the peptide-encapsulated  
142 liposomes. In a similar way, we previously identified CTL epitopes of SARS-CoV pp1a  
143 (30).

144

145 **Results**

146 **Prediction of HLA-A\*02:01-restricted CTL epitopes derived from SARS-CoV-2**

147 **pp1a.**

148 We firstly attempted to predict HLA-A\*02:01-restricted CTL epitopes derived from  
149 SARS-CoV-2 pp1a using four computer-based programs, SYFPEITHI (31), nHLAPred  
150 (32), ProPred-I (33), and IEDB (34). Eighty-two epitopes with high scores for all four  
151 programs were selected and synthesized into 9-mer peptides (Table 1). These peptides  
152 were then evaluated for their binding affinities to HLA-A\*02:01 molecule using  
153 TAP2-deficient RMA-S-HHD cells. As the half-maximal binding level ( $BL_{50}$ ) values of  
154 the influenza A virus matrix protein 1-derived peptide, FMP<sub>58-66</sub> (35) as a high binder  
155 control and the HIV reverse transcriptase-derived peptide, HIV-pol<sub>476-484</sub> (36) as a  
156 medium binder control were 2.3  $\mu$ M and 80.6  $\mu$ M, respectively, we defined a high binder  
157 with a  $BL_{50}$  value below 10  $\mu$ M, a medium binder with a  $BL_{50}$  value ranging from 10 to  
158 100  $\mu$ M, and a low binder with a  $BL_{50}$  value above 100  $\mu$ M. As shown in Table 1, 20  
159 peptides were high binders, whereas 34 peptides were medium binders, suggesting that  
160 the bioinformatics prediction was mostly successful. In contrast, the remaining 28  
161 peptides displayed low affinities or no binding to HLA-A\*02:01 molecules (Table 1). In  
162 the following experiments, 54 peptides involving high binders and medium binders were  
163 chosen to further investigate their abilities of peptide-specific CTL induction.

164



165 **Detection of SARS-CoV-2 pp1a-specific CD8<sup>+</sup> T cell responses in mice immunized**  
166 **with peptide-encapsulated liposomes.**

167 Each of 54 peptides selected were encapsulated into liposomes as described in the  
168 materials and methods. HLA-A\*02:01 transgenic (HHD) mice (37) were then  
169 subcutaneously (s.c.) immunized twice at a one-week interval with each of  
170 peptide-encapsulated liposomes together with CpG adjuvant. One week later, spleen cells  
171 of immunized mice were prepared, stimulated *in vitro* with a relevant peptide for 5 hours,  
172 and stained for their expression of cell-surface CD8 and intracellular interferon-gamma  
173 (IFN- $\gamma$ ). As shown in Fig. 2, the intracellular cytokine staining (ICS) assay showed that  
174 significant numbers of IFN- $\gamma$ -producing CD8<sup>+</sup> T cells were elicited in mice immunized  
175 with 18 liposomal peptides including pp1a-38, -52, -84, -103, -445, -597, -641, -1675,  
176 -2785, -2884, -3083, -3403, -3467, -3583, -3662, -3710, -3732, and -3886, revealing that  
177 these 18 peptides are HLA-A\*02:01-restricted CTL epitopes derived from SARS-CoV-2  
178 pp1a. As indicated in Table 2, multiple epitopes are located in small proteins such as nsp1  
179 (180 aa) and nsp6 (290 aa), whereas only one epitope is seen in the large nsp3 composed  
180 of 1945 amino acids. On the other hand, the remaining 36 peptides out of 54 peptides in  
181 liposomes were not able to stimulate peptide-specific CTLs in mice (data not shown),  
182 demonstrating the necessity to generate data through wet-lab experiments. Interestingly,  
183 four epitopes including pp1a-103, -2884, -3403, and -3467 are located in the amino acid  
184 sequence of SARS-CoV pp1a as well (Table 2). pp1a-3467 was previously reported by us  
185 in the identification of SARS-CoV-derived CTL epitopes (30). However, any of 18

186 epitopes are not found in the amino acid sequence of either MERS-CoV or the four  
187 common cold human coronaviruses involving HCoV-OC43, HCoV-229E, HCoV-NL63,  
188 and HCoV-HKU1.

189 In the 18 positive peptides, 10 peptides including pp1a-38, -84, -641, -1675, -2884,  
190 -3467, -3583, -3662, -3710, and -3732 were selected for the following analyses because  
191 of the high ratios of IFN- $\gamma$ <sup>+</sup> cells in CD8<sup>+</sup> T cells (Fig. 2).

192

### 193 **Identification of dominant CTL epitopes.**

194 To confirm that the 10 peptides are effective epitopes for peptide-specific CTL  
195 responses, we examined whether peptide-specific killing activities were elicited in mice  
196 with each of 10 peptides in liposomes. HHD mice were immunized s.c. twice with each  
197 of peptide-encapsulated liposomes and CpG adjuvant. One week later, equal numbers of  
198 peptide-pulsed and -unpulsed target cells were transferred into immunized mice via i.v.  
199 injection, and peptide-specific lysis was analyzed by flow cytometry. In support of the  
200 data of ICS (Fig. 2), peptide-specific killing was observed in mice immunized with any of  
201 10 liposomal peptides (Fig. 3A).

202 We next attempted to identify dominant CTL epitopes among the 10 CTL epitopes.

203 The same amounts of the 10 peptide solutions at an equal concentration were mixed  
204 together and encapsulated into liposomes. Seventeen mice were immunized once with the  
205 liposomes containing the mixture of 10 peptides. One week later, spleen cells were  
206 incubated with each of the 10 peptides for 5 hours, and the ICS assay was performed. As

207 shown in Fig. 3B & C, pp1a-38 and -84 were statistically predominant over almost all  
208 other peptides in the induction of peptide-specific IFN- $\gamma$ <sup>+</sup> CD8<sup>+</sup> T cells. Furthermore,  
209 pp1a-641 and pp1a-3732 were significantly superior to pp1a-1675/-3583 and  
210 pp1a-1675/-3583/-3662 in the stimulation of IFN- $\gamma$ -producing CD8<sup>+</sup> T cells, respectively  
211 (Fig. 3B).

212 We also examined the peptide-specific induction of CD107a<sup>+</sup> CD8<sup>+</sup> T cells and CD69<sup>+</sup>  
213 CD8<sup>+</sup> T cells. CD107a and CD69 are markers of degranulation and early activation on  
214 CD8<sup>+</sup> T lymphocytes, respectively. Nine mice were immunized once with the liposomes  
215 encapsulating the mixture of the 10 peptides. After one week, spleen cells were  
216 stimulated with each peptide, and stained for their expression of CD107a or CD69 of  
217 CD8<sup>+</sup> T cells. At first glance, the graphs of CD107a (Fig. 4A) and CD69 (Fig. 4B)  
218 expression were similar to that of IFN- $\gamma$  expression of CD8<sup>+</sup> T cells (Fig. 3C). As shown  
219 in Figs. 4A & 4C, both pp1a-38 and pp1a-84 were superior to almost all other peptides  
220 for the CD107a expression of CD8<sup>+</sup> T cells. Moreover, pp1a-641 and pp1a-3732 elicited  
221 CD107a-positive T cells better than pp1a-1675/-2884/-3467 and  
222 pp1a-1675/-2884/-3467/-3583, respectively. In the case of CD69 expression (Figs. 4B &  
223 4D), pp1a-38 and pp1a-3732 were more dominant than pp1a-1675/-2884/-3467/-3583 and  
224 pp1a-1675/-2884/-3467/-3583/-3662, respectively. Further, pp1a-84 was superior to  
225 pp1a-1675/-2884.

226 Taken together, 10 peptides differed significantly in their ability to induce  
227 SARS-CoV-2 pp1a-specific CTLs when mice were immunized with the mixture of 10

228 peptides in liposomes. Thus, some peptides were found to be dominant CTL epitopes  
229 although each peptide alone of the 10 peptides has the capability to efficiently activate  
230 peptide-specific CTL (Figs. 2 & 3A).

231

### 232 **Existence of an immunodominance hierarchy.**

233 The data in Fig. 5 indicate reactivity to the 10 peptides in each of 15 mice immunized  
234 with the mixture of the 10 peptides in liposomes. Each graph represents reactivity of an  
235 individual mouse (Fig. 5). Unexpectedly, all mice did not show the same reaction pattern  
236 against the 10 peptides. It looks like there were roughly three types that varied  
237 sequentially in terms of the reaction pattern to the 10 peptides. Type A is a group of mice  
238 in which pp1a-38, -84, -641-specific IFN- $\gamma^+$  CD8 $^+$  T cells were predominantly elicited,  
239 whereas the remaining 7 peptides were not able to activate peptide-specific IFN- $\gamma^+$  CD8 $^+$   
240 T cells. In the case of type B, pp1a-3732 stimulated peptide-specific IFN- $\gamma^+$  CD8 $^+$  T cells  
241 as well as pp1a-38, and -84. In addition to these three peptides, several other peptides also  
242 induced IFN- $\gamma^+$  CD8 $^+$  T cells in Type C. These data suggest that there seems to be an  
243 immunodominance hierarchy composed of three stages in CD8 $^+$  T cell responses to the 10  
244 peptides. The immunodominance hierarchy may provide us more variations for designing  
245 CTL-based COVID-19 vaccines.

246

247 **Discussion**

248 After the epidemics of SARS and MERS, scientists have not succeeded yet in  
249 developing preventive or therapeutic vaccines available for re-emergence of them. In the  
250 SARS and MERS vaccine development, the full-length S protein or its S1 subunit have  
251 frequently been used as an antigen to produce anti-RBD neutralizing antibodies.  
252 However, these vaccine candidates provided partial protection against virus challenge in  
253 animal models accompanied by safety concerns such as ADE (1). Furthermore, antibody  
254 responses to coronaviruses rapidly wane following infection or immunization (23, 24,  
255 26). Considering the above, it should be necessary to consider CTL-based vaccine against  
256 SARS-CoV-2 to provide robust long-lived T cell memory although neutralizing antibody  
257 responses are a primary vaccine target.

258 In the current study, we aimed to find HLA-A\*02:01-restricted CTL dominant  
259 epitopes derived from SARS-CoV-2. Dominant epitopes induce strong immune response  
260 to eliminate a certain pathogen fast and effectively, and also contribute to make the  
261 memory T cell pool. We focused on pp1a of SARS-CoV-2 to find out CTL epitopes  
262 because pp1a is a largest and conserved polyprotein among the constituent proteins.  
263 Further, pp1a is produced earlier than structural proteins, suggesting that pp1a-specific  
264 CTLs can eliminate infected cells before the formation of mature virions. To predict CTL  
265 epitopes, we utilized bioinformatics to select 82 peptides with high scores in four kinds of  
266 computer-based programs (Table 1). In the evaluation of peptide binding, 54 peptides  
267 showed high or medium binding affinities to HLA-A\*02:01 molecules, whereas the

268 remaining 28 peptides displayed low binding affinities or no binding (Table 1). Out of  
269 them, only eighteen peptides were found to be CTL epitopes. Hence, we have to keep in  
270 mind that currently available algorithms have a limited ability to accurately predict CTL  
271 epitopes although the bioinformatics approach is very useful to quickly predict a number  
272 of epitopes in a large protein (38, 39).

273 Among 18 epitopes which we have identified in the current study, 4 epitopes including  
274 pp1a-103, -2884, -3403, and -3467 are present in the amino acid sequence of SARS-CoV  
275 pp1a (100% identity) (Table 2). Therefore, CTLs induced by these four epitopes could  
276 work fine for the clearance of SARS-CoV as well. In support of this data, Le Bert et al.,  
277 reported that long lasting memory T cells in SARS-recovered individuals cross-reacted to  
278 N protein of SARS-CoV-2 (40). Recently, several studies found that  
279 SARS-CoV-2-reactive CD4<sup>+</sup> and CD8<sup>+</sup> T cells were detected in a substantial proportion  
280 of healthy donors who have never infected with SARS-CoV-2 or SARS-CoV (40-44). It  
281 is most likely that these individuals were previously infected with one of the four human  
282 coronaviruses (HCoV-229E, -NL63, -OC43 and -HKU1) that cause seasonal common  
283 cold. Nelde et al. demonstrated evidence that the amino acid sequences of several  
284 SARS-CoV-2 T cell epitopes recognized by unexposed individuals are similar to some  
285 amino acid sequences in the four seasonal common cold human coronaviruses with  
286 identities ranging from 10% to 89% (not 100% identity) (44). However, anyone has not  
287 shown evidence that people with this cross-reactivity are less susceptible to COVID-19.  
288 It may be also possible to assume that pre-existing T cell immunity might be detrimental

289 through mechanisms such as original antigenic sin or ADE (45). In the current data, any  
290 of the 18 epitopes was not found in the amino acid sequences of the four human  
291 coronaviruses, suggesting that effective common CTL epitopes derived from pp1a, if any,  
292 might be very few.

293 Here, we focused on CTL epitopes restricted by HLA-A\*02:01 which is the most  
294 common HLA class I allele in the world, and used highly reactive HLA-A\*02:01  
295 transgenic mice, termed HHD mice (37). Although we can use lymphocytes of  
296 SARS-CoV-2-infected individuals to identify CTL epitopes, there are mainly two  
297 advantages to using HHD mice. First, a large amount of blood of patients is required for  
298 examine many candidates of CTL epitopes, but any number of mice can be prepared for  
299 this purpose. Second, when using patients' lymphocytes, we are only testing whether the  
300 peptide candidates are recognized by memory CTLs. When using naïve mice, however,  
301 we can find whether the epitope candidates are able to prime peptide-specific CTLs,  
302 which may be a better criterion to judge them as vaccine antigens. It is supposed that the  
303 efficient epitope for CTL recognition is not always efficient for CTL priming. However,  
304 we should take into account that the immunogenic variation in HLA class I transgenic  
305 mice may not be identical to that in humans because the antigen processing and  
306 presentation differ between them.

307 In the previous studies, we used peptide-linked liposomes as an immunogen (30). The  
308 surface-linked liposomal peptides were effective for peptide-specific CTL induction in  
309 mice. However, attaching peptides to the surface of liposomes followed by purifying

310 them through the column is a fairly complicated process and time-consuming. In the  
311 current study, peptide-encapsulated liposomes were used as an immunogen. In contrast to  
312 the peptide-linked liposomes, the peptide-encapsulated liposomes are prepared by just  
313 mixing liposomes and the peptide. In addition, the peptide-encapsulated liposomes are  
314 able to prime peptide-specific CTLs in mice as efficiently as the peptide-linked  
315 liposomes. Liposome itself consisting of lipid bilayers is a very safe material for humans.  
316 Therefore, the peptide-encapsulated liposomes are considered to be promising as a  
317 CTL-based vaccine candidate.

318 Understanding the mechanism of immunodominance is obviously important for the  
319 development of effective vaccines. When mice were immunized with liposomes  
320 containing the mixture of 10 peptides, it was found that some peptides induced  
321 peptide-specific CTLs stronger than other peptides (Figs. 3 & 4). As shown in Figs. 3 &  
322 4, pp1a-38 and -84 are considered to be relatively dominant in comparison with other  
323 peptides. In general, dominant epitope-specific CTLs are activated sooner and proliferate  
324 faster than subdominant epitope-specific CTLs. This immunodominance may be  
325 associated with the affinity of peptide to MHC-I molecules and the affinity of T-cell  
326 receptor (TCR) to the peptide-MHC-I complex. As shown in Table I, the peptide affinity  
327 of pp1a-84 to HLA-A\*02:01 is very high ( $BL_{50} = 6.8 \mu\text{M}$ ), while pp1a-38 is a medium  
328 binder ( $BL_{50} = 76.8 \mu\text{M}$ ). Interestingly, the peptide affinity of pp1a-38 is lowest among  
329 the 10 peptides selected (Table I). These data suggest that the affinity of TCR to the  
330 peptide-MHC-I complex is critical for CTL immunodominance. In the selection of



331 antigenic epitopes for the CTL-based vaccine against SARS-CoV-2, dominant epitopes  
332 such as pp1a-38 and -84 should be chosen because they produce strong CTL response to  
333 eliminate virus-infected cells effectively. However, the immunological pressure exerted  
334 by dominant epitopes may allow the epitope sequences of SARS-CoV-2 to be mutated,  
335 and therefore, a vaccine containing multiple antigenic epitopes should be recommended  
336 for a successful COVID-19 vaccine.

337 It was surprising that all of the genetically identical mice did not show the same  
338 reactive pattern against the 10 peptides when they were immunized with liposomes  
339 containing the mixture of 10 peptides (Fig. 5). There were roughly three pattern types,  
340 A-C, that varied sequentially, suggesting the existence of an immunodominance  
341 hierarchy composed of three stages in CD8<sup>+</sup> T cell responses to the 10 peptides (Fig. 5).  
342 The differences among the three types might be explained by the timing of CTL  
343 expansion. In the type A, dominant peptides, pp1a-38, -84, and -641 presumably  
344 activated T cells more efficiently than the other peptides, and hence, dominant  
345 peptide-specific CTLs proliferate faster and curtail the expansion of CTLs specific for the  
346 other peptides. In the type B, it is considered that the expansion of dominant CTLs  
347 specific for pp1a-38, and -84 was delayed for some reason compared to that in type A,  
348 and thereby subdominant CTLs specific for pp1a-3732 could afford to expand. It is also  
349 thought that even non-dominant CTLs proliferated because the expansion of both  
350 dominant CTLs and subdominant CTLs in the type C was later than that in the type B.  
351 Although it is difficult to explain what caused difference in the timing of CTL expansion

352 among three reaction types, it should be important to find out what it is for the  
353 development of CTL-based peptide vaccine.

354 In summary, we have identified 18 kinds of HLA-A\*02:01-restricted CTL epitopes  
355 derived from pp1a of SARS-CoV-2 using computational algorithms, HLA-A\*02:01  
356 transgenic mice and the peptide-encapsulated liposomes. Out of 18 epitopes, we have  
357 also found some dominant CTL epitopes such as pp1a-38 and -84. In the process of  
358 finding dominant epitopes, we showed the existence of an immunodominance hierarchy  
359 in CD8<sup>+</sup> T cell responses to these epitopes. The immunodominance hierarchy composed  
360 of multiple stages may offer us more variations in the epitope selection for designing  
361 CTL-based COVID-19 vaccines. These data may provide important information for  
362 further studies of T cell immunity in COVID-19 and the development of preventive  
363 and/or therapeutic CTL-based vaccines against SARS-CoV-2.

364

365

366 **Materials and Methods**

367 **Prediction of CTL epitopes.**

368 Four computer-based programs including SYFPEITHI (31), nHLAPred (32), ProPred-I  
369 (33), and IEDB (34) were used to predict HLA-A\*02:01-restricted CTL epitopes derived  
370 from pp1a of SARS-CoV-2 (GenBank accession numbers: LC528232.1 & LC528233.1).  
371 As shown in Table 1, 82 peptides with superior scores were selected and were  
372 synthesized by Eurofins Genomics (Tokyo, Japan). Two control peptides, FMP<sub>58-66</sub>  
373 (sequence: GILFGVFTL) (35) and HIV-pol<sub>476-484</sub> (sequence: ILKEPVHGV) (36), were  
374 synthesized as well.

375

376 **Mice.**

377 We used HLA-A\*02:01 transgenic mice (37) that express a transgenic HLA-A\*02:01  
378 monochain, designated as HHD, in which human  $\beta$ 2-microglobulin is covalently linked  
379 to a chimeric heavy chain composed of HLA-A\*02:01 ( $\alpha$ 1 and  $\alpha$ 2 domains) and H-2D<sup>b</sup>  
380 ( $\alpha$ 3, transmembrane, and cytoplasmic domains). Six- to ten-week-old mice were used for  
381 all experiments. Mice were housed in appropriate animal care facilities at Saitama  
382 Medical University, and were handled according to the international guideline for  
383 experiments with animals. This study was approved by the Animal Research Committee  
384 of Saitama Medical University.

385

386 **Cell lines.**

387 RMA-S-HHD is a TAP2-deficient mouse lymphoma cell line, RMA-S (H-2<sup>b</sup>)  
388 transfected with the HHD gene (37). RMA-S-HHD was cultured in RPMI-1640 medium  
389 (Nacalai Tesque Inc., Kyoto, Japan) with 10% FCS (Biowest, Nuaille, France) and 500  
390 µg/ml G418 (Nacalai Tesque Inc.)

391

### 392 **Peptide binding assay.**

393 Binding of peptides to the HLA-A\*02:01 molecule was measured using RMA-S-HHD  
394 cells, as described (46). Briefly, RMA-S-HHD cells were pre-cultured overnight at 26°C  
395 in a CO<sub>2</sub> incubator, and then pulsed with each peptide at various concentrations ranging  
396 from 0.01 µM to 100 µM for 1 hour at 26°C. After 3 hours' incubation at 37°C,  
397 peptide-pulsed cells were stained with anti-HLA-A2 monoclonal antibody, BB7.2 (47),  
398 followed by FITC-labeled goat anti-mouse IgG antibody (Sigma-Aldrich, St. Louis, MO).  
399 Mean fluorescence intensity (MFI) of HLA-A2 expression on the surface of  
400 RMA-S-HHD cells was measured by flow cytometry (FACSCanto™ II, BD Biosciences,  
401 Franklin Lakes, NJ), and standardized as the percent cell surface expression by the  
402 following formula: % relative binding = [(MFI of cells pulsed with each peptide) –  
403 (MFI of cells incubated at 37°C without a peptide)] / [(MFI of cells incubated at 26°C  
404 without a peptide) – (MFI of cells incubated at 37°C without a peptide)] × 100. The  
405 concentration of each peptide that yields the 50% relative binding was calculated as the  
406 half-maximal binding level (BL<sub>50</sub>). FMP<sub>58-66</sub> and HIV-pol<sub>476-484</sub> were used as control  
407 peptides.

408

409 **Peptide-encapsulated liposomes.**

410 Peptide-encapsulated liposomes were prepared using Lipocapsulater FD-U PL  
411 (Hygieia BioScience, Osaka, Japan) according to the manufacturer's instructions with a  
412 slight modification. In brief, each of 54 synthetic peptides was dissolved in DMSO at a  
413 final concentration of 10 mM. For the first screening, the same amounts of 4 to 5 kinds of  
414 10 mM peptides were mixed to make a total 100  $\mu$ l, which was then diluted with 1.9 ml  
415 of H<sub>2</sub>O. For the second screening, 20  $\mu$ l of each peptide at 10 mM was diluted to 2 ml  
416 with H<sub>2</sub>O. For the identification of dominant epitopes among the 10 peptides selected, 20  
417  $\mu$ l of each of the 10 peptide solutions at a concentration of 10 mM was mixed together,  
418 and the total volume was increased to 2 ml by adding 1.8 ml of H<sub>2</sub>O. The peptide  
419 solution was added into a vial of Lipocapsulater containing 10 mg of dried liposomes,  
420 and incubated for 15 min at room temperature. The resultant solution contains  
421 peptide-encapsulated liposomes.

422

423 **Immunization.**

424 Mice were immunized s.c. once or twice at a one-week interval with  
425 peptide-encapsulated liposomes (100  $\mu$ l/mouse) together with CpG-ODN (5002:  
426 5'-TCCATGACGTTCTTGATGTT-3', Hokkaido System Science, Sapporo, Japan) (5  
427  $\mu$ g/mouse) in the footpad.

428

429 **Intracellular cytokine staining (ICS).**

430 ICS was performed as described (30). In brief, after 1 wk following immunization,  
431 spleen cells were incubated with 50  $\mu$ M of each peptide for 5 hours at 37°C in the  
432 presence of brefeldin A (GolgiPlug<sup>TM</sup>, BD Biosciences), and were stained with  
433 FITC-conjugated anti-mouse CD8 monoclonal antibody (mAb) (BioLegend, San Diego,  
434 CA). Cells were then fixed, permeabilized, and stained with phycoerythrin  
435 (PE)-conjugated rat anti-mouse IFN- $\gamma$  mAb (BD Biosciences). After washing the cells,  
436 flow cytometric analyses were performed using flow cytometry (FACSCanto<sup>TM</sup> II, BD  
437 Biosciences).

438

439 **Detection of CD107a and CD69 molecules on CD8<sup>+</sup> T cells.**

440 For the detection of CD107a, spleen cells of immunized mice were incubated with 50  
441  $\mu$ M of each peptide for 6 hours at 37°C in the presence of monensin (GolgiStop<sup>TM</sup>, BD  
442 Biosciences) and 0.8  $\mu$ g of FITC-conjugated anti-mouse CD107a mAb (BioLegend).  
443 Cells were then stained with PE-Cy5-conjugated anti-mouse CD8 mAb (BioLegend). For  
444 the examination of CD69 marker, spleen cells of immunized mice were stimulated with  
445 50  $\mu$ M of each peptide for 4 hours at 37°C. Cells were then stained with PE-conjugated  
446 anti-mouse CD69 mAb (BioLegend) and FITC-conjugated anti-mouse CD8 mAb.  
447 Stained cells were analyzed by flow cytometry (FACSCanto<sup>TM</sup> II, BD Biosciences).

448

449 ***In vivo* CTL assay.**

450 *In vivo* CTL assay was carried out as described (46). In brief, spleen cells from naive  
451 HHD mice were equally split into two populations. One population was pulsed with 50  
452  $\mu\text{M}$  of a relevant peptide and labeled with a high concentration (2.5  $\mu\text{M}$ ) of  
453 carboxyfluorescein diacetate succinimidyl ester (CFSE) (Molecular Probes, Eugene, OR).  
454 The other population was unpulsed and labeled with a lower concentration (0.25  $\mu\text{M}$ ) of  
455 CFSE. An equal number ( $1 \times 10^7$ ) of cells from each population was mixed together and  
456 adoptively transferred i.v. into mice that had been immunized once with a liposomal  
457 peptide. Sixteen hours later, spleen cells were prepared and analyzed by flow cytometry.  
458 To calculate specific lysis, the following formula was used: % specific lysis =  
459  $[1 - \{(\text{number of CFSE}^{\text{low}} \text{ cells in normal mice}) / (\text{number of CFSE}^{\text{high}} \text{ cells in normal}$   
460  $\text{mice})\} / \{(\text{number of CFSE}^{\text{low}} \text{ cells in immunized mice}) / (\text{number of CFSE}^{\text{high}} \text{ cells in}$   
461  $\text{immunized mice})\}] \times 100.$

462

### 463 **Statistical analyses.**

464 One-way ANOVA followed by post-hoc tests was performed for statistical analyses  
465 among multiple groups using Graphpad Prism 5 software (GraphPad software, San  
466 Diego, CA). A value of  $P < 0.05$  was considered statistically significant.

467

468

469 **ACKNOWLEDGMENTS**

470 The authors are grateful to Professor François A. Lemonnier (Pasteur Institute, Paris,  
471 France) for providing HHD mice and RMA-S-HHD cells. This work was supported by a  
472 Grant-in-Aid for Scientific Research (C) (JSPS KAKENHI Grant Number: JP18K06631)  
473 to M. M., a Grant-in-Aid for Early-Career Scientists (JSPS KAKENHI Grant Number:  
474 JP18K15430) to A. T. from Japan Society for the Promotion of Science, and a Grant  
475 from Ochiai memorial award 2018 to A. T. The authors have no conflicting financial  
476 interests.  
477



478 **References**

- 479 1. Sariol A, Perlman S. 2020. Lessons for COVID-19 immunity from other  
480 coronavirus infections. *Immunity* 53:248-263.
- 481 2. Srinivasan S, Cui H, Gao Z, Liu M, Lu S, Mkandawire W, Narykov O, Sun M,  
482 Korkin D. 2020. Structural genomics of SARS-CoV-2 indicates evolutionary  
483 conserved functional regions of viral proteins. *Viruses* 12:360.  
484 <https://doi.org/10.3390/v12040360>.
- 485 3. Walls AC, Park YJ, Tortorici MA, Wall A, McGuire AT, Velesler D. 2020.  
486 Structure, function, and antigenicity of the SARS-CoV-2 spike glycoprotein *Cell*  
487 181:281-292.
- 488 4. Hoffmann M, Kleine-Weber H, Schroeder S, Krüger N, Herrler T, Erichsen S,  
489 Schiergens TS, Herrler G, Wu NH, Nitsche A, Müller MA, Drosten C, Pöhlmann S.  
490 2020. SARS-CoV-2 cell entry depends on ACE2 and TMPRSS2 and is blocked by a  
491 clinically proven protease inhibitor. *Cell* 181:271-280.
- 492 5. Thevarajan I, Nguyen THO, Koutsakos M, Druce J, Caly L, van de Sandt CE, Jia X,  
493 Nicholson S, Catton M, Cowie B, Tong SYC, Lewin SR, Kedzierska K. 2020.  
494 Breadth of concomitant immune responses prior to patient recovery: a case report of  
495 non-severe COVID-19. *Nat Med* 26:453-455.
- 496 6. Gao, Q, Bao L, Mao H, Wang L, Xu K, Yang M, Li Y, Zhu L, Wang N, Lv Z, Gao H,  
497 Ge X, Kan B, Hu Y, Jiangning Liu J, Cai F, Jiang D, Yin Y, Qin C, Li J, Gong X,  
498 Lou X, Shi W, Wu D, Zhang H, Zhu L, Deng W, Li Y, Lu J, Li C, Wang X, Yin W,

- 499 Zhang Y, Qin C. 2020. Development of an inactivated vaccine candidate for  
500 SARS-CoV-2. *Science* 369:77-81.
- 501 7. Guebre-Xabier M, Patel N, Tian J-H, Zhou B, Maciejewski S, Lam K, Portnoff AD,  
502 Massare MJ, Frieman MB, Piedra PA, Ellingsworth L, Glenn G, Gale Smith G.  
503 2020. NVX-CoV2373 vaccine protects cynomolgus macaque upper and lower  
504 airways against SARS-CoV-2 challenge. *bioRxiv*  
505 <https://doi.org/10.1101/2020.08.18.256578>.
- 506 8. Walsh EE, Frenck R, Falsey AR, Kitchin N, Absalon J, Gurtman A, Lockhart S,  
507 Neuzil K, Mulligan MJ, Bailey R, Swanson KA, Li P, Koury K, Kalina W, Cooper  
508 D, Fontes-Garfias C, Shi P-Y, Türeci Z, Tompkins KR, Lyke KE, Raabe V,  
509 Dormitzer PR, Jansen KU, Şahin U, Gruber WC. 2020. RNA-based COVID-19  
510 vaccine BNT162b2 selected for a pivotal efficacy study. *medRxiv*  
511 <https://doi.org/10.1101/2020.08.17.20176651>.
- 512 9. Yu J, Tostanoski LH, Peter L, Mercado NB, McMahan K, Mahrokhian SH, Nkolola  
513 JP, Liu J, Li Z, Chandrashekar A, Martinez DR, Loos C, Atyeo C, Fischinger S,  
514 Burke JS, Slein MD, Chen Y, Zuiani A, Lelis FJN, Travers M, Habibi S, Pessaint L,  
515 Ry AV, Blade K, Brown R, Cook A, Finneyfrock B, Dodson A, Teow E, Velasco J,  
516 Zahn R, Wegmann F, Bondzie EA, Dagotto G, Gebre MS, He X, Jacob-Dolan C,  
517 Kirilova M, Kordana N, Lin Z, Maxfield LF, Nampanya F, Nityanandam R, Ventura  
518 JD, Wan H, Cai Y, Chen B, Schmidt AG, Wesemann DR, Baric RS, Alter G,

- 519 Andersen H, Lewis MG, Barouch DH. 2020. DNA vaccine protection against  
520 SARS-CoV-2 in rhesus macaques. *Science* 369:806-811.
- 521 10. Hassan AO, Kafai NM, Dmitriev IP, Fox JM, Smith BK, Harvey IB, Chen RE,  
522 Winkler ES, Wessel AW, Case JB, Kashentseva E, McCune BT, Bailey AL, Zhao  
523 H, VanBlargan LA, Dai Y-N, Ma M, Adams LJ, Shrihari S, Danis JE, Gralinski LE,  
524 Hou YJ, Schäfer A, Kim AS, Keeler SP, Weiskopf D, Baric RS, Holtzman MJ,  
525 Fremont DH, Curiel DT, Diamond MS. 14 August 2020. A single-dose intranasal  
526 ChAd vaccine protects upper and lower respiratory tracts against SARS-CoV-2.  
527 *Cell* <https://doi.org/10.1016/j.cell.2020.08.026>
- 528 11. Iwasaki A, Yang Y. 2020. The potential danger of suboptimal antibody responses in  
529 COVID-19. *Nat Rev Immunol* 20:339-341.
- 530 12. Arvin AM, Fink K, Schmid MA, Cathcart A, Spreafico R, Havenar-Daughton C,  
531 Lanzavecchia A, Corti D, Virgin HW. 2020. A perspective on potential  
532 antibody-dependent enhancement of SARS-CoV-2. *Nature* 584:353-363.
- 533 13. Weingart H, Czub M, Czub S, Neufeld J, Marszal P, Gren J, Smith G, Jones S,  
534 Proulx R, Deschambault Y, Grudeski E, Andonov A, He R, Li Y, Copps J, Grolla A,  
535 Dick D, Berry J, Ganske S, Manning L, Cao J. 2004. Immunization with modified  
536 vaccinia virus Ankara-based recombinant vaccine against severe acute respiratory  
537 syndrome is associated with enhanced hepatitis in ferrets. *J Virol* 78:12672-12676.
- 538 14. Tseng CT, Sbrana E, Iwata-Yoshikawa N, Newman PC, Garron T, Atmar RL, Peters  
539 CJ, Couch RB. 2012. Immunization with SARS coronavirus vaccines leads to

- 540 pulmonary immunopathology on challenge with the SARS virus. PLoS One  
541 7:e35421.
- 542 15. Wang SF, Tseng SP, Yen CH, Yang JY, Tsao CH, Shen CW, Chen KH, Liu FT, Liu  
543 WT, Chen YM, Huang JC. 2014. Antibody-dependent SARS coronavirus infection  
544 is mediated by antibodies against spike proteins. *Biochem Biophys Res Commn*  
545 451:208-214.
- 546 16. Liu L, Wei Q, Lin Q, Fang J, Wang H, Kwok H, Tang H, Nishiura K, Peng J, Tan Z,  
547 Wu T, Cheung K-W, Chan K-H, Alvarez X, Qin C, Lackner A, Perlman S, Yuen  
548 K-Y, Chen Z. 2019. Anti-spike IgG causes severe acute lung injury by skewing  
549 macrophage responses during acute SARS-CoV infection. *JCI Insight* 4:e123158.
- 550 17. Robbiani DF, Gaebler C, Muecksch F, Lorenzi JCC, Wang Z, Cho A, Agudelo M,  
551 Barnes CO, Gazumyan A, Finkin S, Hägglöf T, Oliveira TY, Viant C, Hurley A,  
552 Hoffmann HH, Millard KG, Kost RG, Cipolla M, Gordon K, Bianchini F, Chen ST,  
553 Ramos V, Patel R, Dizon J, Shimeliovich I, Mendoza P, Hartweg H, Nogueira L,  
554 Pack M, Horowitz J, Schmidt F, Weisblum Y, Michailidis E, Ashbrook AW, Waltari  
555 E, Pak JE, Huey-Tubman KE, Koranda N, Hoffman PR, West AP Jr, Rice CM,  
556 Hatziioannou T, Bjorkman PJ, Bieniasz PD, Caskey M, Nussenzweig MC. 2020.  
557 Convergent antibody responses to SARS-CoV-2 in convalescent individuals. *Nature*  
558 584:437-442.
- 559 18. Juno JA, Tan H-X, Lee WS, Reynaldi A, Kelly HG, Wragg K, Esterbauer R, Kent  
560 HE, Batten J, Mordant FL, Gherardin NA, Pymm P, Dietrich MH, Scott NE, Tham

- 561 W-H, Godfrey DI, Subbarao K, Davenport MP, Kent SJ, Wheatley AK. 13 July  
562 2020. Humoral and circulating follicular helper T cell responses in recovered  
563 patients with COVID-19. <https://doi.org/10.1038/s41591-020-0995-0>.
- 564 19. Pinto D, Park Y-J, Beltramello M, Walls AC, Tortorici A, Bianchi S, Jaconi S,  
565 Culap K, Zatta F, De Marco, A, Peter A, Guarino B, Spreafico R, Cameroni E, Case  
566 JB, Chen RE, Havenar-Daughton C, Snell G, Telenti A, Virgin HW, Lanzavecchia  
567 A, Diamond MS, Fink K, Veessler D, Corti D. 2020. Cross-neutralization of  
568 SARS-CoV-2 by a human monoclonal SARS-CoV antibody. *Nature* 583:290-295.
- 569 20. Liu L, Wang P, Nair MS, Yu J, Rapp M, Wang Q, Luo Y, Chan JF-W, Sahi V,  
570 Figueroa A, Guo XV, Cerutti G, Bimela J, Gorman J, Zhou T, Chen Z, Yuen K-W,  
571 Kwong PD, Sodroski JG, Yin MT, Sheng Z, Huang Y, Shapiro L, Ho DD. 2020.  
572 Potent neutralizing antibodies against multiple epitopes on SARS-CoV-2 spike.  
573 *Nature* 584: 450-456.
- 574 21. Zost SJ, Gilchuk P, Case JB, Binshtein E, Chen RE, Nkolola JP, Schäfer A, Reidy  
575 JX, Trivette A, Nargi RS, Sutton RE, Suryadevara N, Martinez DR, Williamson LE,  
576 Chen EC, Jones T, Day S, Myers L, Hassan AO, Kafai NM, Winkler ES, Fox JM,  
577 Shrihari S, Mueller BK, Meiler J, Chandrashekar A, Mercado NB, Steinhardt JJ,  
578 Ren K, Loo Y-M, Kallewaard NL, McCune BT, Keeler SP, Holtzman MJ, Barouch  
579 DH, Gralinski LE, Baric RS, Thackray LB, Diamond MS, Carnahan RH, Crowe Jr  
580 JE. 2020. Potently neutralizing and protective human antibodies against  
581 SARS-CoV-2. *Nature* 584: 443-449.

- 582 22. Ledford H. 2020. Antibody therapies could be a bridge to a coronavirus vaccine-but  
583 will the world benefit? *Nature* 584:333-334.
- 584 23. Cao W-C, Liu W, Zhang P-H, Zhang F, Richardus JH. 2007. Disappearance of  
585 antibodies to SARS-associated coronavirus after recovery. *N Engl J Med*  
586 357:1162-1163.
- 587 24. Mo H, Zeng G, Ren X, Li H, Ke C, Tan Y, Cai C, Lai K, Chen R, Chan-Yeung M,  
588 Zhong N. 2006. Longitudinal profile of antibodies against SARS-coronavirus in  
589 SARS patients and their clinical significance. *Respirology* 11:49-53.
- 590 25. Ng OW, Chia A, Tan AT, Jadi RS, Leong HN, Bertoletti A, Tan YJ. 2016. Memory  
591 T cell responses targeting the SARS coronavirus persist up to 11 years  
592 post-infection. *Vaccine* 34:2008-2014.
- 593 26. Seow J, Graham C, Merrick B, Acors S, Steel KJA, Hemmings O, O'Bryne A,  
594 Kouphou N, Pickering S, Galao RP, Betancor G, Wilson HD, Signell AW, Winstone  
595 H, Kerridge C, Temperton N, Snell L, Bisnauthsing K, Moore A, Green A, Martinez  
596 L, 6 , Stokes B, Honey J, Izquierdo-Barras A, Arbane G, Patel A, O'Connell L,  
597 O'Hara G, MacMahon E, Douthwaite S, Nebbia G, Batra R, Martinez-Nunez R,  
598 Edgeworth JD, Neil SJD, Malim MH, Doores KJ. 2020. Logitudinal evaluation and  
599 decline of antibody responses in SARS-CoV-2 infection. *medRxiv*  
600 <https://doi.org/10.1101/2020.07.09.20148429>.
- 601 27. Diao B, Wang C, Tan Y, Chen X, Liu Y, Ning L, Chen L, Li M, Liu Y, Wang G,  
602 Yuan Z, Feng Z, Zhang Y, Wu Y, Chen Y. 2020. Reduction and functional

- 603 exhaustion of T cells in patients with coronavirus disease 2019 (COVID-19). *Front*  
604 *immunol* 11:1729. <https://doi.org/10.3389/fimmu.2020.01729>.
- 605 28. Lucas C, Wong P, Klein J, Castro TBR, Silva J, Sundaram M, Ellingson MK, Mao  
606 T, Oh JE, Israelow B, Takahashi T, Tokuyama M, Lu P, Venkataraman A, Park A,  
607 Mohanty S, Wang H, Wyllie AL, Vogels CBF, Earnest R, Lapidus S, Ott IM, Moore  
608 AJ, Muenker MC, Fournier JB, Campbell M, Odio CD, Casanovas-Massana A; Yale  
609 IMPACT Team, Herbst R, Shaw AC, Medzhitov R, Schulz WL, Grubaugh ND,  
610 Dela Cruz C, Farhadian S, Ko AI, Omer SB, Iwasaki A. 2020. Longitudinal analyses  
611 reveal immunological misfiring in severe COVID-19. *Nature* 584: 463-469.
- 612 29. Cui J, Li F, Shi ZL. Origin and evolution of pathogenic coronaviruses. 2019. *Nat*  
613 *Rev Microbiol* 17:181-192.
- 614 30. Kohyama S, Ohno S, Tatsuya Suda T, Taneichi M, Yokoyama S, Mori M,  
615 Kobayashi A, Hayashi H, Tetsuya Uchida T, Matsui M. 2009. Efficient induction of  
616 cytotoxic T lymphocytes specific for severe acute respiratory syndrome  
617 (SARS)-associated coronavirus by immunization with surface-linked liposomal  
618 peptides derived from a non-structural polyprotein 1a. *Antiviral Res* 84:168-177.
- 619 31. Rammensee H, Bachmann J, Emmerich NP, Bachor OA, Stevanović S. 1999.  
620 SYFPEITHI: database for MHC ligands and peptide motifs. *Immunogenetics*  
621 50:213-219.
- 622 32. Bhasin M, Raghava GPS. 2006. A hybrid approach for predicting promiscuous  
623 MHC class I restricted T cell epitopes. *J Biosci* 32:31-42.

- 624 33. Singh H, Raghava GPS. 2003. ProPred1: Prediction of promiscuous MHC class-I  
625 binding sites. *Bioinformatics* 19:1009-1014.
- 626 34. Vita R, Mahajan S, Overton JA, Dhanda SK, Martini S, Cantrell JR, Wheeler DK,  
627 Sette A, Peters B. 2019. The immune epitope database (IEDB): 2018  
628 update. *Nucleic Acids Res* 47(D1):D339-D343.  
629 <https://doi.org/10.1093/nar/gky1006>.
- 630 35. Gotch F, Rothbard J, Howland K, Townsend A, McMichael A. 1987. Cytotoxic T  
631 lymphocytes recognize a fragment of influenza virus matrix protein in association  
632 with HLA-A2. *Nature* 326:881-882.
- 633 36. Tsomides TJ, Walker BD, Eisen HN. 1991. An optimal viral peptide recognized by  
634 CD8<sup>+</sup> T cells binds very tightly to the restricting class I major histocompatibility  
635 complex protein on intact cells but not to the purified class I protein. *Proc Natl*  
636 *Acad Sci U S A* 88:11276-11280.
- 637 37. Pascolo S, Bervas N, Ure JM, Smith AG, Lemonnier FA, Pérarnau B. 1997.  
638 HLA-A2.1-restricted education and cytolytic activity of CD8<sup>+</sup> T lymphocytes from  
639 beta2 microglobulin (beta2m) HLA-A2.1 monochain transgenic H-2D<sup>b</sup> beta2m  
640 double knockout mice. *J Exp Med* 185:2043-2051.
- 641 38. Grifoni A, Sidney J, Zhang Y, Scheuermann RH, Peters B, Sette A. 2020. A  
642 sequence homology and bioinformatics approach can predict candidate targets for  
643 immune responses to SARS-CoV-2. *Cell Host & Microbe* 27:671-680, 2020.



- 644 39. Ong E, Wong MU, Huffman A, He Y. COVID-19 coronavirus vaccine design using  
645 reverse vaccinology and machine learning. *Front Immunol* 11:1581.  
646 <https://doi.org/10.3389/fimmu.2020.01581>.
- 647 40. Le Bert N, Tan AT, Kunasegaran K, Tham CYL, Hafezi M, Chia A, Chng MHY, Lin  
648 M, Tan N, Linster M, Chia WN, Chen MI, Wang LF, Ooi EE, Kalimuddin S,  
649 Tambyah PA, Low JG, Tan YJ, Bertoletti A. 2020. SARS-CoV-2-specific T cell  
650 immunity in cases of COVID-19 and SARS, and uninfected controls. *Nature*  
651 584:457-462.
- 652 41. Mateus J, Grifoni A, Tarke A, John Sidney J, Ramirez SI, Dan JM, Burger ZC,  
653 Rawlings SA, Smith DM, Phillips E, Mallal S, Lammers M, Rubiro P, Quiambao L,  
654 Sutherland A, Yu ED, Antunes RS, Greenbaum J, Frazier A, Markmann AJ,  
655 Premkumar L, de Silva A, Peters B, Crotty S, Sette A, Weiskopf D. 2020. Selective  
656 and cross-reactive SARS-CoV-2 T cell epitopes in unexposed humans. *Science* 4  
657 August 2020. eabd3871. <https://doi.org/10.1126/science.abd3871>.
- 658 42. Grifoni A, Weiskopf D, Ramirez SI, Mateus J, Dan JM, Moderbacher CR, Rawlings  
659 SA, Sutherland A, Premkumar L, Jadi RS, Marrama D, de Silva AM, Frazier A,  
660 Carlin AF, Greenbaum JA, Peters B, Krammer F, Smith DM, Crotty S, 1,2,5, Sette A.  
661 2020. Targets of T cell responses to SARS-CoV-2 coronavirus in humans with  
662 COVID-19 disease and unexposed individuals. *Cell* 181:1489-1501.
- 663 43. Braun J, Loyal L, Frentsch M, Wendisch D, Georg P, Kurth F, Hippenstiel S,  
664 Dingeldey M, Kruse B, Fauchere F, Baysal E, Mangold M, Henze L, Lauster R,

- 665 Mall MA, Beyer K, Röhmel J, Voigt S, Schmitz J, Miltenyi S, Demuth I, Müller  
666 MA, Hocke A, Witzentrath M, Suttorp N, Kern F, Reimer U, Wenschuh H, Drosten  
667 C, Corman VM, Giesecke-Thiel C, Sander LE, Thiel A. 2020.  
668 SARS-CoV-2-reactive T cells in healthy donors and patients with COVID-19.  
669 Nature <https://doi.org/10.1038/s41586-020-2598-9>.
- 670 44. Nelde A, Bilich T, Heitmann JS, Maringer Y, Salih HR, Roerden M, Lübke M,  
671 Bauer J, Jonas Rieth J, Wacker M, Peter A, Hörber S, Traenkle B, Kaiser PD,  
672 othbauer U, Becker M, Junker D, Krause G, Strengert M, Schneiderhan-Marra N,  
673 Templin MF, Joos TO, Kowalewski DJ, Stos-Zweifel V, Fehr M, Graf M, Gruber  
674 L-C, Rachfalski D, Preuß B, Hagelstein I, Märklin M, Bakchoul T, Gouttefangeas  
675 C, Kohlbacher O, Klein R, Stevanović S, Rammensee H-G, Walz JS. 2020.  
676 SARS-CoV-2-epitopes define heterologous and COVID-19-induced T-cell  
677 recognition. Research Square <http://doi.org/10.21203/rs.3.rs-35331/v1>.
- 678 45. Sette A, Crotty, S. 2020. Pre-existing immunity to SARS-CoV-2: the knowns and  
679 unknowns. Nat Rev Immunol 20:457-458.
- 680 46. Matsui M, Kawano M, Matsushita S, Akatsuka T. 2014. Introduction of a point  
681 mutation into an HLA class I single-chain trimer induces enhancement of CTL  
682 priming and antitumor immunity. Mol Ther Methods Clin Dev 1:14027.  
683 <https://doi.org/10.1038/mtm.2014.27>.

684 47. Parham, P and Brodsky, FM. 1981. Partial purification and some properties of  
685 BB7.2. A cytotoxic monoclonal antibody with specificity for HLA-A2 and a variant  
686 of HLA-A28. Hum Immunol 3: 277-299.  
687

688 **Figure legends**

689 **Fig. 1.** The linear diagrams of the SARS-CoV-2 genome and the protein subunits of  
690 ORF1a. The SARS-CoV-2 genome consists of ORF1a, ORF1b, Spike (S), ORF3a,  
691 Envelope (E), Membrane (M), ORF6, ORF7a, ORF7b, ORF8, Nucleocapsid (N), and  
692 ORF10. The ORF1a polyprotein is composed of eleven non-structural proteins,  
693 nsp1-nsp11.

694

695 **Fig. 2.** Intracellular IFN- $\gamma$  staining of CD8<sup>+</sup> T cells specific for peptides derived from  
696 SARS-CoV-2 pp1a. HHD mice were immunized twice with each of predicted peptides of  
697 SARS-CoV-2 pp1a in liposomes together with CpG. After one week, spleen cells were  
698 prepared and stimulated with (+) or without (-) a relevant peptide for 5 hours. Cells were  
699 then stained for their surface expression of CD8 (x axis) and their intracellular expression  
700 of IFN- $\gamma$  (y axis). The numbers shown indicate the percentages of intracellular IFN- $\gamma$ <sup>+</sup>  
701 cells within CD8<sup>+</sup> T cells. Three to five mice per group were used in each experiment,  
702 and the spleen cells of the mice per group were pooled.

703

704 **Fig. 3.** (A) *In vivo* killing activities specific for the 10 peptides. HHD mice were  
705 immunized twice with either each of the 10 liposomal peptides (pp1a-38, -84, -641,  
706 -1675, -2884, -3467, -3583, -3662, 3710, and -3732) or liposomes alone together with  
707 CpG. One week later, *in vivo* peptide-specific killing activities were measured. Three to  
708 five mice per group were used, and the data of % specific lysis are shown as the mean  $\pm$

709 SD. (B & C) Comparison of the 10 peptides in the induction of IFN- $\gamma$ <sup>+</sup> CD8<sup>+</sup> T cells.  
710 Seventeen HHD mice were immunized once with the mixture of 10 peptides involving  
711 pp1a-38, -84, -641, -1675, -2884, -3467, -3583, -3662, -3710, and -3732 in liposomes  
712 with CpG. After one week, spleen cells were stimulated with or without each of the 10  
713 peptides, and intracellular IFN- $\gamma$  in CD8<sup>+</sup> T cells was stained. (C) Y-axis indicates the  
714 relative percentages of IFN- $\gamma$ <sup>+</sup> cells in CD8<sup>+</sup> T cells which were calculated by subtracting  
715 the % of IFN- $\gamma$ <sup>+</sup> cells in CD8<sup>+</sup> T cells without a peptide from the % of IFN- $\gamma$ <sup>+</sup> cells in  
716 CD8<sup>+</sup> T cells with a relevant peptide. Each blue circle represents an individual mouse.  
717 Data are shown as the mean (horizontal bars)  $\pm$  SD. (B) Statistical comparisons of the  
718 relative % values of IFN- $\gamma$ <sup>+</sup> CD8<sup>+</sup> T cells among the 10 peptides in Fig. 3C were made by  
719 one-way ANOVA followed by post-hoc tests. \*,  $P < 0.05$ ; \*\*,  $P < 0.01$ ; \*\*\*,  $P < 0.001$ ;  
720 ns, not significant.

721

722 **Fig. 4.** Comparison of the 10 peptides in the induction of CD107a<sup>+</sup> CD8<sup>+</sup> T cells (A) and  
723 CD69<sup>+</sup> CD8<sup>+</sup> T cells (B). Nine HHD mice were immunized once with the mixture of 10  
724 peptides involving pp1a-38, -84, -641, -1675, -2884, -3467, -3583, -3662, -3710, and  
725 -3732 in liposomes with CpG. After one week, spleen cells were stimulated with or  
726 without each of the 10 peptides, and the expression of CD107a (A) or CD69 (B) on CD8<sup>+</sup>  
727 T cells was analyzed. Data indicates the relative percentages of CD107a<sup>+</sup> (A) and CD69<sup>+</sup>  
728 (B) cells in CD8<sup>+</sup> T cells which were obtained by subtracting the % of CD107a<sup>+</sup> and  
729 CD69<sup>+</sup> cells in CD8<sup>+</sup> T cells without a peptide from the % of CD107a<sup>+</sup> and CD69<sup>+</sup> cells

730 in CD8<sup>+</sup> T cells with a peptide, respectively. Each red (A) or green (B) circle represents  
731 an individual mouse. Data are shown as the mean (horizontal bars)  $\pm$  SD. Statistical  
732 analyses of the data among the 10 peptides in Fig. 4A and Fig. 4B were performed by  
733 one-way ANOVA followed by post-hoc tests in Fig. 4C and Fig 4D, respectively. \*,  $P <$   
734 0.05; \*\*,  $P < 0.01$ ; \*\*\*,  $P < 0.001$ ; ns, not significant.

735

736 **Fig. 5.** Three types of reactivity in mice immunized with the mixture of the 10 peptides.  
737 Fifteen mice were immunized once with the mixture of 10 peptides including pp1a-38,  
738 -84, -641, -1675, -2884, -3467, -3583, -3662, -3710, and -3732 in liposomes with CpG.  
739 After one week, spleen cells were stimulated with or without each of the 10 peptides, and  
740 intracellular IFN- $\gamma$  in CD8<sup>+</sup> T cells was stained. Based on the reactivity pattern to the 10  
741 peptides, fifteen mice were divided into three types, A-C. Each graph represents  
742 reactivity of an individual mouse. Y-axis indicates the relative percentage of IFN- $\gamma$ <sup>+</sup> cells  
743 in CD8<sup>+</sup> T cells which was calculated by subtracting the % of IFN- $\gamma$ <sup>+</sup> cells in CD8<sup>+</sup> T  
744 cells without a peptide from the % of IFN- $\gamma$ <sup>+</sup> cells in CD8<sup>+</sup> T cells with a relevant peptide.  
745 Statistical analyses of the relative % values to 10 peptides in each type were performed by  
746 one-way ANOVA followed by post-hoc tests. \*,  $P < 0.05$ ; \*\*,  $P < 0.01$ ; \*\*\*,  $P < 0.001$ ;  
747 ns, not significant.

748

**Table 1.** Predicted CTL epitopes for the SARS-CoV-2 non-structural polyprotein 1a

| High binders   |           |                  |           |            |                  |
|----------------|-----------|------------------|-----------|------------|------------------|
| Name           | Sequence  | BL <sub>50</sub> | Name      | Sequence   | BL <sub>50</sub> |
| pp1a-84        | VMVELVAEL | 6.8 ± 0.3        | pp1a-103  | TLGVLVPHV  | 1.3 ± 0.2        |
| pp1a-214       | TLSEQLDFI | 2.0 ± 0.2        | pp1a-445  | GLNDNLLEI  | 6.0 ± 0.2        |
| pp1a-597       | VMAYITGGV | 9.5 ± 0.9        | pp1a-619  | TVYEKCLKPV | 5.6 ± 0.7        |
| pp1a-641       | FLRDGWEIV | 0.9 ± 0.1        | pp1a-1675 | YLATALTL   | 8.4 ± 0.2        |
| pp1a-2270      | YLNSTNVTI | 8.9 ± 0.3        | pp1a-2569 | ILLDQALV   | 9.6 ± 1.5        |
| pp1a-2785      | AIFYLITPV | 5.1 ± 1.6        | pp1a-2968 | YLEGSVRV   | 7.5 ± 0.1        |
| pp1a-3013      | SLPGVFCGV | 3.1 ± 0.2        | pp1a-3115 | YLTNDVSFL  | 4.8 ± 0.3        |
| pp1a-3122      | FLAHIQWMV | 6.9 ± 0.4        | pp1a-3128 | WMVMFTPLV  | 9.8 ± 1.1        |
| pp1a-3587      | ILTSLLVLV | 8.3 ± 0.9        | pp1a-3710 | TLMNVTLV   | 2.0 ± 0.4        |
| pp1a-3732      | SMWALIISV | 8.9 ± 0.4        | pp1a-4094 | ALWEIQQVV  | 6.4 ± 0.4        |
| Medium binders |           |                  |           |            |                  |
| Name           | Sequence  | BL <sub>50</sub> | Name      | Sequence   | BL <sub>50</sub> |
| pp1a-15        | QLSLPVLQV | 79.4 ± 4.4       | pp1a-38   | VLSEARQHL  | 76.8 ± 6.8       |
| pp1a-52        | GLVEVEKGV | 14.5 ± 4.9       | pp1a-106  | VLVPHVGEI  | 76.0 ± 2.0       |
| pp1a-468       | KLNEEIAII | 56.2 ± 4.8       | pp1a-600  | YITGGVVQL  | 48.5 ± 7.9       |
| pp1a-685       | FLALCADSI | 10.2 ± 0.5       | pp1a-702  | ALNLGETFV  | 40.7 ± 2.8       |
| pp1a-1109      | NLAKHCLHV | 38.5 ± 8.2       | pp1a-1114 | CLHVVGPNV  | 62.9 ± 2.3       |
| pp1a-1161      | SLRVCVDTV | 85.7 ± 1.9       | pp1a-1312 | MLAKALRKV  | 95.2 ± 0.7       |
| pp1a-2168      | YMPYFFTL  | 99.0 ± 2.4       | pp1a-2332 | ILFTRFFYV  | 96.5 ± 14.0      |
| pp1a-2563      | QLMCQPILL | 11.1 ± 1.8       | pp1a-2884 | FLPRVFSAV  | 29.3 ± 6.5       |
| pp1a-3047      | IVAGGIVAI | 50.5 ± 2.5       | pp1a-3083 | LLFLMSFTV  | 39.4 ± 0.9       |
| pp1a-3183      | FLLNKEMYL | 12.9 ± 6.8       | pp1a-3403 | FLNGSCGSV  | 18.7 ± 3.2       |
| pp1a-3467      | VLAWLYAAV | 45.0 ± 10.8      | pp1a-3475 | VINGDRWFL  | 85.0 ± 5.4       |
| pp1a-3482      | FLNRFTTTL | 79.0 ± 9.6       | pp1a-3583 | LLLTILTSL  | 63.8 ± 3.1       |
| pp1a-3639      | FLLPSLATV | 15.0 ± 4.4       | pp1a-3662 | RIMTWLDMV  | 76.5 ± 7.1       |
| pp1a-3753      | FLARGIVFM | 71.2 ± 12.9      | pp1a-3798 | CLLNRYFRL  | 81.6 ± 20.2      |
| pp1a-3807      | TLGVYDYL  | 61.7 ± 8.7       | pp1a-3871 | VLLSVLQQL  | 44.9 ± 6.0       |
| pp1a-3886      | KLWAQCQQL | 27.2 ± 9.4       | pp1a-4183 | ALLSDLQDL  | 42.4 ± 6.1       |
| pp1a-4266      | VLSFCAFAV | 20.1 ± 6.1       | pp1a-4283 | YLASGGQPI  | 39.8 ± 6.2       |
| Low binders    |           |                  |           |            |                  |
| Name           | Sequence  | BL <sub>50</sub> | Name      | Sequence   | BL <sub>50</sub> |
| pp1a-572       | GISQYSLRL | ND               | pp1a-589  | DLATNNLVV  | ND               |
| pp1a-692       | SIHGGAKL  | ND               | pp1a-881  | KTLQPVSEL  | 161.7 ± 28.3     |
| pp1a-1143      | VLLAPLLSA | ND               | pp1a-1148 | LLSAGIFGA  | ND               |
| pp1a-1214      | FITESKPSV | 122.1 ± 31.7     | pp1a-1367 | ILGTVSWNL  | 123.2 ± 11.3     |
| pp1a-1387      | KLMPVCVET | 174.2 ± 33.5     | pp1a-1433 | SLINTLNDL  | 123.4 ± 11.0     |
| pp1a-1642      | FLGRYMSAL | 124.1 ± 1.9      | pp1a-1962 | DLNGDVVAI  | ND               |
| pp1a-2076      | ILKPANNSL | ND               | pp1a-2226 | LINIIWFL   | ND               |
| pp1a-2228      | NIIWFLLL  | ND               | pp1a-2230 | IIWFLLSV   | 176.7 ± 6.3      |
| pp1a-2235      | LLSVCLGSL | ND               | pp1a-2242 | SLIYSTAAL  | 134.0 ± 7.6      |
| pp1a-2249      | ALGVLMNSL | ND               | pp1a-2348 | QLFFSYFAV  | 146.4 ± 19.7     |
| pp1a-2363      | WLMWLIINL | 102.7 ± 6.4      | pp1a-2364 | LMWLIINLV  | 159.0 ± 42.8     |
| pp1a-2901      | KLIEYTDFA | 126.0 ± 2.5      | pp1a-3344 | SMQNCVLKL  | 104.5 ± 2.2      |
| pp1a-3827      | GLLPPKNSI | ND               | pp1a-3839 | KLNIKLLGV  | 213.5 ± 85.7     |
| pp1a-3917      | VLLSMQGAV | 112.3 ± 7.2      | pp1a-4032 | MLFTMLRKL  | 165.8 ± 21.7     |

Data of peptide binding assays are shown as  $BL_{50}$ , indicating a concentration ( $\mu\text{M}$ ) of each peptide that yields the 50% relative binding as shown in the materials and methods. Experiments were performed in triplicate and repeated twice with similar results. Data are given as mean values  $\pm$  SD. High binders:  $BL_{50} < 10 \mu\text{M}$ ; Medium binders:  $10 \mu\text{M} \leq BL_{50} < 100 \mu\text{M}$ ; Low binders:  $BL_{50} \geq 100 \mu\text{M}$  or ND (not detected).



**Table 2**

Comparison of amino acid sequences of SARS-CoV-2 pp1a CTL epitopes with the amino acid sequence of SARS-CoV

| SARS-CoV-2 |           |            |         | SARS-CoV  |              |
|------------|-----------|------------|---------|-----------|--------------|
| Name       | Start-End | Sequence   | Protein | Sequence  | Identity (%) |
| pp1a-38    | 38-46     | VLSEARQHL  | nsp1    | ALSEAREHL | 89           |
| pp1a-52    | 52-60     | GLVEVEKGV  | nsp1    | GLVELEKGV | 89           |
| pp1a-84    | 84-92     | VMVELVAEL  | nsp1    | KVVELVAEM | 67           |
| pp1a-103   | 103-11    | TLGVLVPHV  | nsp1    | TLGVLVPHV | 100          |
| pp1a-445   | 445-53    | GLNDNLLEI  | nsp2    | TLNEDLLEI | 67           |
| pp1a-597   | 597-605   | VMA YITGGV | nsp2    | IMAYVTGGL | 67           |
| pp1a-641   | 641-9     | FLRDGWEIV  | nsp2    | FLKDAWEIL | 67           |
| pp1a-1675  | 1675-83   | YLATALLT   | nsp3    |           |              |
| pp1a-2785  | 2785-93   | AIFYLITPV  | nsp4    |           |              |
| pp1a-2884  | 2884-92   | FLPRVFSAV  | nsp4    | FLPRVFSAV | 100          |
| pp1a-3083  | 3083-91   | LLFLMSFTV  | nsp4    | LLFLMSFTI | 89           |
| pp1a-3403  | 3403-11   | FLNGSCGSV  | nsp5    | FLNGSCGSV | 100          |
| pp1a-3467  | 3467-75   | VLAWLYAAV  | nsp5    | VLAWLYAAV | 100          |
| pp1a-3583  | 3583-91   | LLL TILTSL | nsp6    |           |              |
| pp1a-3662  | 3662-70   | RIMTWLDMV  | nsp6    | RIMTWLELA | 67           |
| pp1a-3710  | 3710-8    | TLMNVLT LV | nsp6    | TLMNVITLV | 89           |
| pp1a-3732  | 3732-40   | SMWALIISV  | nsp6    | SMWALVISV | 89           |
| pp1a-3886  | 3886-94   | KLWAQCVQL  | nsp7    |           |              |

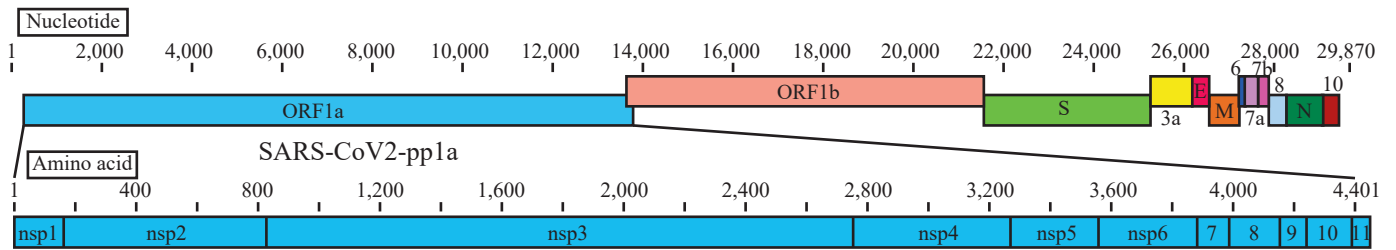

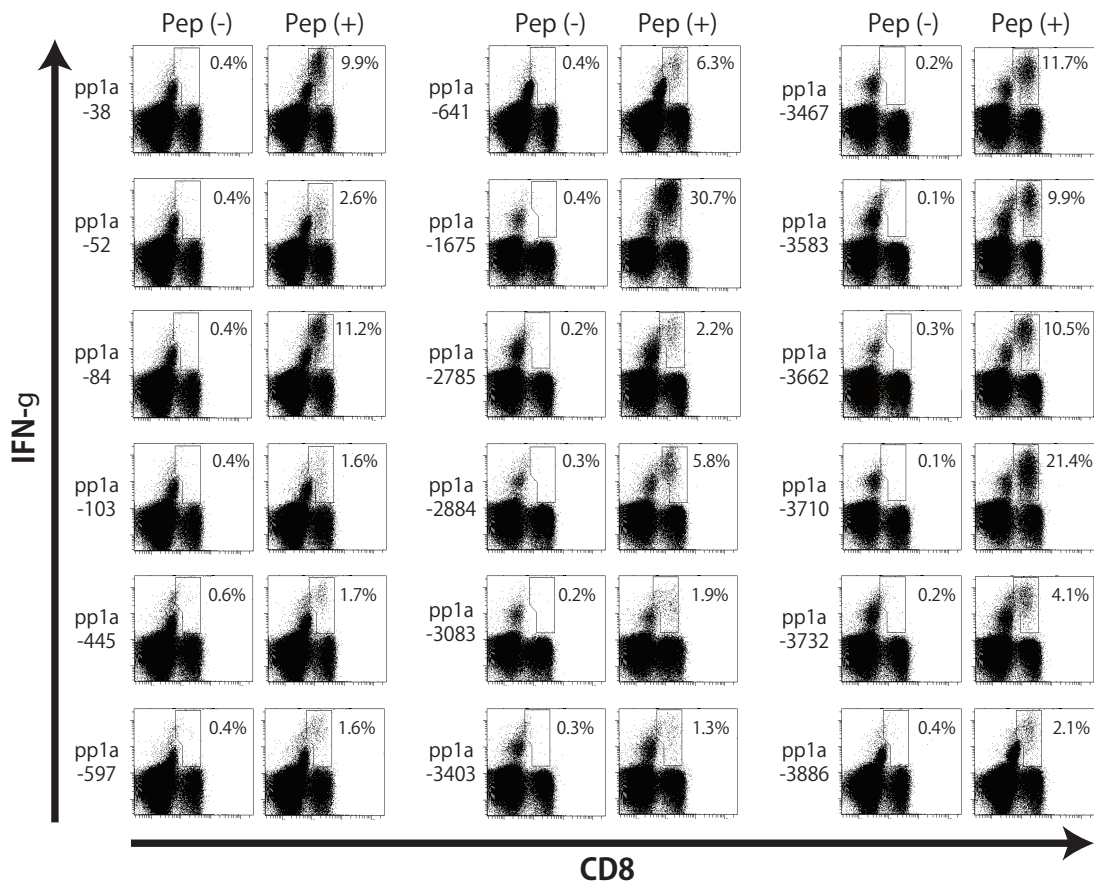

| A         |                  | B  |    |     |      |      |      |      |      |      |      |  |
|-----------|------------------|----|----|-----|------|------|------|------|------|------|------|--|
| Name      | % Specific Lysis | 38 | 84 | 641 | 1675 | 2884 | 3467 | 3583 | 3662 | 3710 | 3732 |  |
| pp1a-38   | 78.2 ± 15.0      | —  | ns | ns  | ***  | ***  | **   | ***  | ***  | ns   | ns   |  |
| pp1a-84   | 92.2 ± 6.7       | —  | —  | ns  | ***  | ***  | ***  | ***  | ***  | *    | ns   |  |
| pp1a-641  | 78.9 ± 16.2      |    |    | —   | *    | ns   | ns   | *    | ns   | ns   | ns   |  |
| pp1a-1675 | 84.6 ± 11.0      |    |    |     | —    | ns   | ns   | ns   | ns   | ns   | *    |  |
| pp1a-2884 | 77.9 ± 7.5       |    |    |     |      | —    | ns   | ns   | ns   | ns   | ns   |  |
| pp1a-3467 | 83.8 ± 6.7       |    |    |     |      |      | —    | ns   | ns   | ns   | ns   |  |
| pp1a-3583 | 86.8 ± 15.9      |    |    |     |      |      |      | —    | ns   | ns   | *    |  |
| pp1a-3662 | 87.3 ± 5.4       |    |    |     |      |      |      |      | —    | ns   | *    |  |
| pp1a-3710 | 80.2 ± 10.3      |    |    |     |      |      |      |      |      | —    | ns   |  |
| pp1a-3732 | 88.6 ± 5.8       |    |    |     |      |      |      |      |      |      | —    |  |

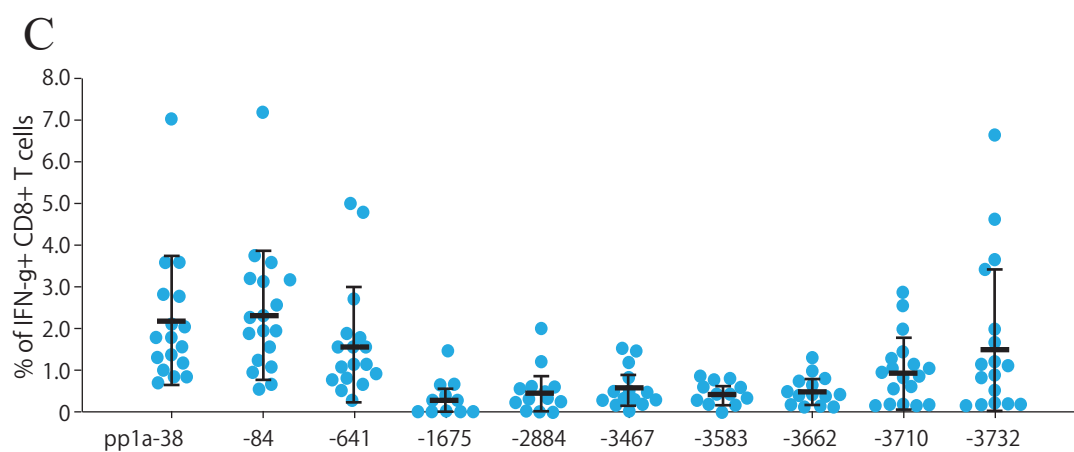



### Type A

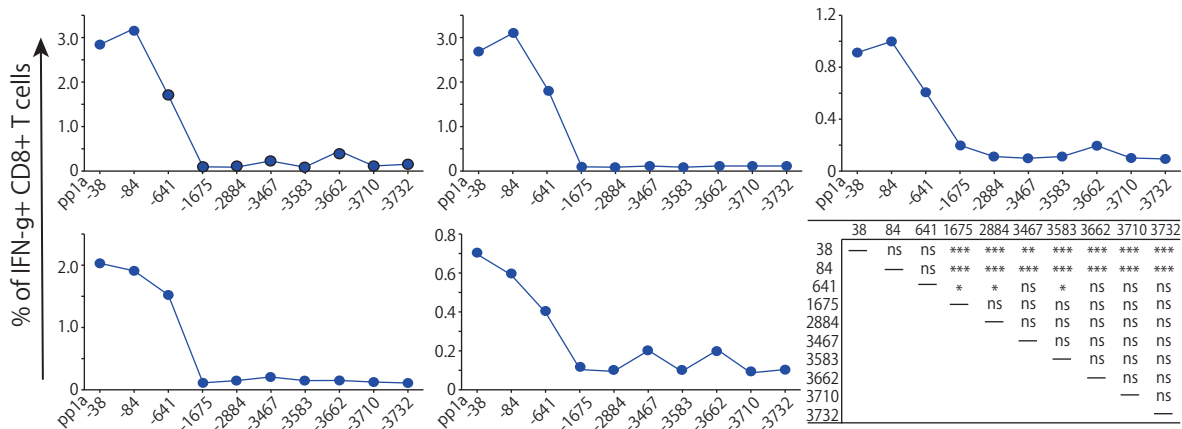

### Type B

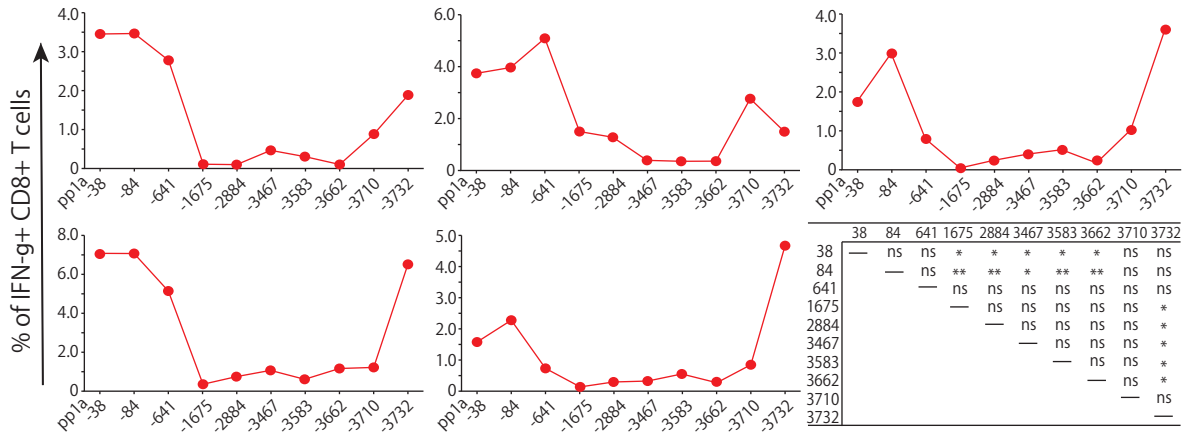

### Type C

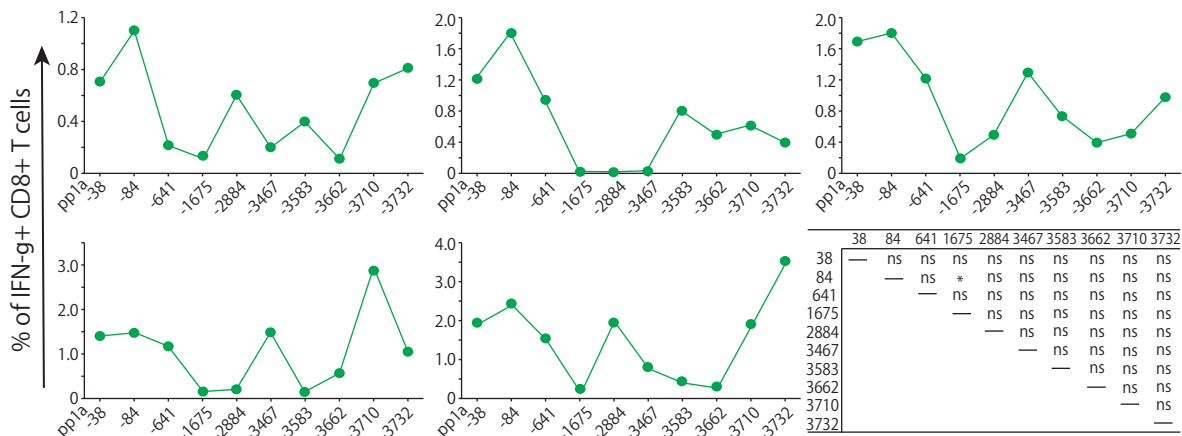

Source: http://biorxiv.org/content/10.1101/2020.09.18.304493v1.full.pdf
